# Supplementary material for: A Gene Transfer Agent and a Dynamic Repertoire of Secretion Systems Hold the Keys to the Explosive Radiation of the Emerging Pathogen Bartonella
Source: PubMed Central journal article supplement (PMC3610622; doi:10.1371/journal.pgen.1003393), 2013-03-28

**Tree tested:**

|                   | <b>1</b>   | <b>2</b> | <b>3</b> | <b>4</b> | <b>5</b> |
|-------------------|------------|----------|----------|----------|----------|
| baseml (codon)    | <b>298</b> | 22       | 40       | 1        | 67       |
| <i>% of total</i> | 69.6       | 5.1      | 9.3      | 0.2      | 15.7     |
| codeml (AA)       | <b>153</b> | 65       | 61       | 8        | 141      |
| <i>% of total</i> | 35.7       | 15.2     | 14.3     | 1.9      | 32.9     |

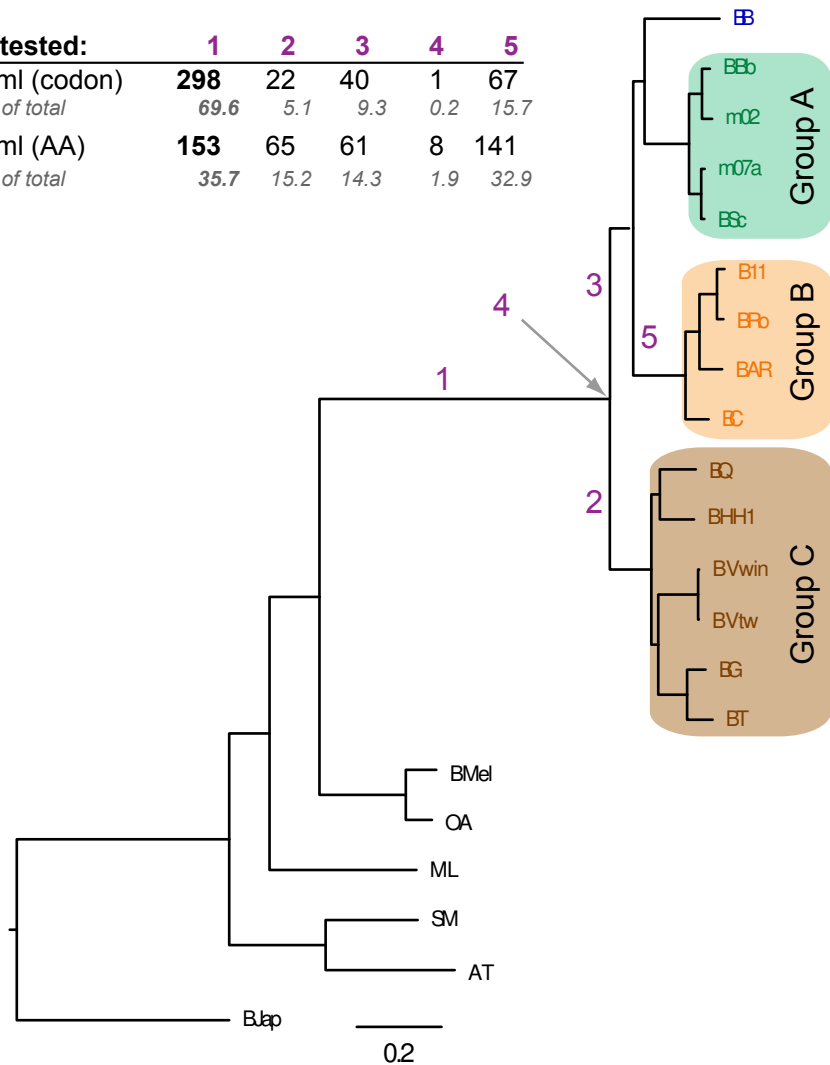

Supplement: pgen.1003393.s004.pdf [file pgen.1003393.s004.pdf]
