# Supplementary material for: A Gene Transfer Agent and a Dynamic Repertoire of Secretion Systems Hold the Keys to the Explosive Radiation of the Emerging Pathogen Bartonella
Source: PubMed Central journal article supplement (PMC3610622; doi:10.1371/journal.pgen.1003393), 2013-03-28
Supplement: pgen.1003393.s005.pdf [file pgen.1003393.s005.pdf]

A

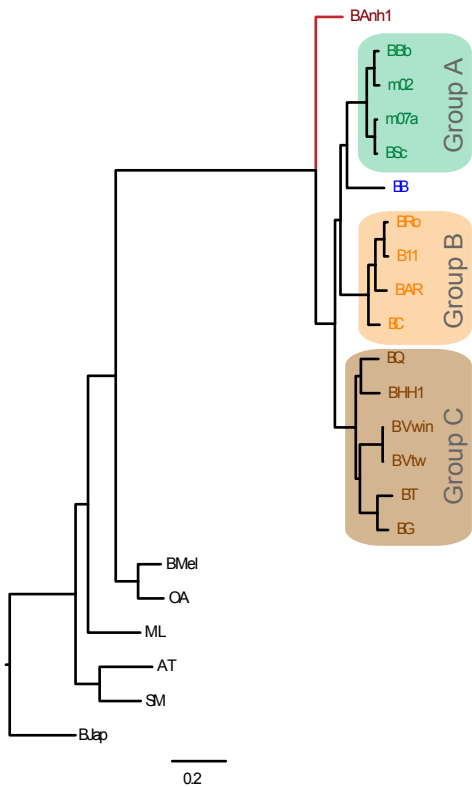

B

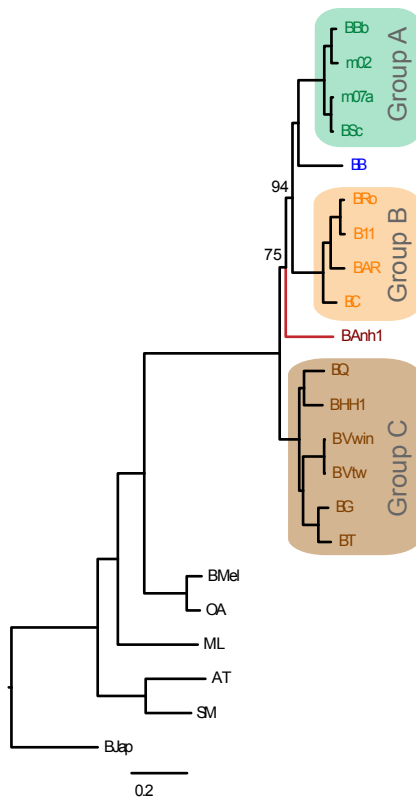

C

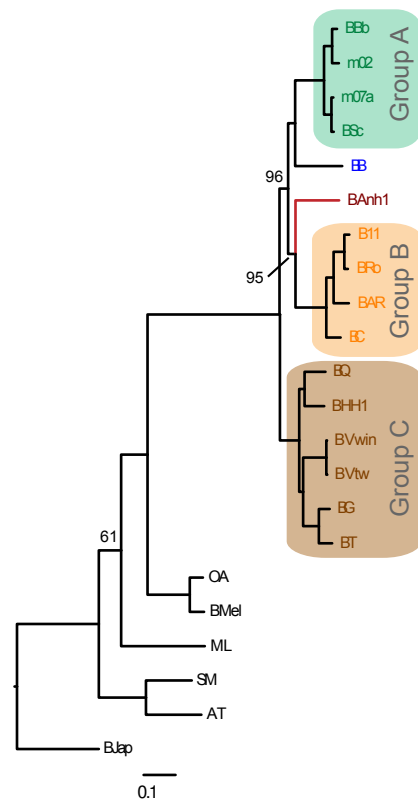

## Datasets

## Best tree picked by RAxML for each of the alignments

|                                       |                                                           |                                               |                                                   |
|---------------------------------------|-----------------------------------------------------------|-----------------------------------------------|---------------------------------------------------|
| Nucleotide                            | Full concatenation<br>All divergence level concatenations | none                                          | none                                              |
| Amino acid                            | 15-20% divergence level<br>20-25% divergence level        | Full concatenation                            | 5-10% divergence level<br>10-15% divergence level |
| Nucleotide without 3rd codon position | 15-20% divergence level<br>20-25% divergence level        | Full concatenation<br>10-15% divergence level | 5-10% divergence level                            |
