# Supplementary material for: A Gene Transfer Agent and a Dynamic Repertoire of Secretion Systems Hold the Keys to the Explosive Radiation of the Emerging Pathogen Bartonella
Source: PubMed Central journal article supplement (PMC3610622; doi:10.1371/journal.pgen.1003393), 2013-03-28
Supplement: pgen.1003393.s006.pdf [file pgen.1003393.s006.pdf]

# Group C

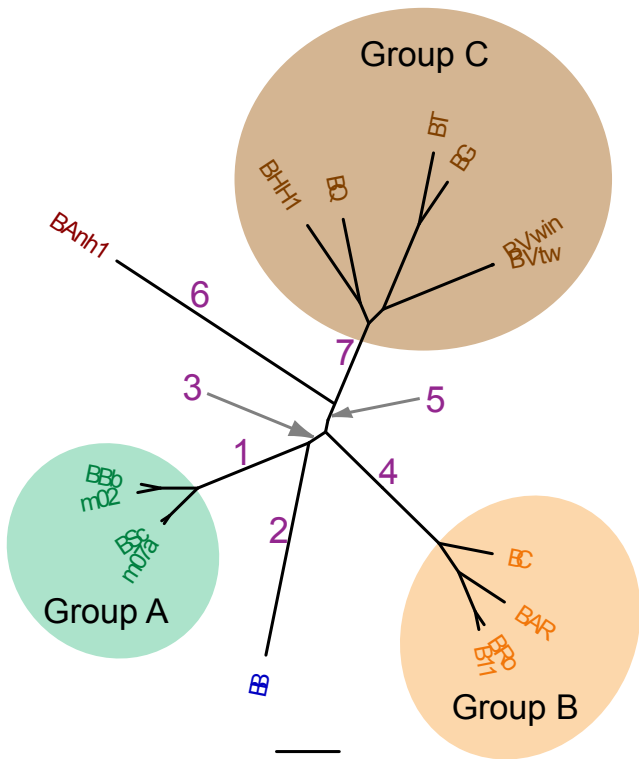

0.05

## Tree tested:

|                   | 1   | 2    | 3   | 4    | 5   | 6           | 7    |
|-------------------|-----|------|-----|------|-----|-------------|------|
| baseml (codon)    | 32  | 71   | 3   | 22   | 1   | <b>259</b>  | 40   |
| <i>% of total</i> | 7.5 | 16.6 | 0.7 | 5.1  | 0.2 | <b>60.5</b> | 9.3  |
| codeml (AA)       | 43  | 93   | 8   | 52   | 14  | <b>127</b>  | 91   |
| <i>% of total</i> | 10  | 21.7 | 1.9 | 12.1 | 3.3 | <b>29.7</b> | 21.3 |
