# Supplementary material for: A Gene Transfer Agent and a Dynamic Repertoire of Secretion Systems Hold the Keys to the Explosive Radiation of the Emerging Pathogen Bartonella
Source: PubMed Central journal article supplement (PMC3610622; doi:10.1371/journal.pgen.1003393), 2013-03-28

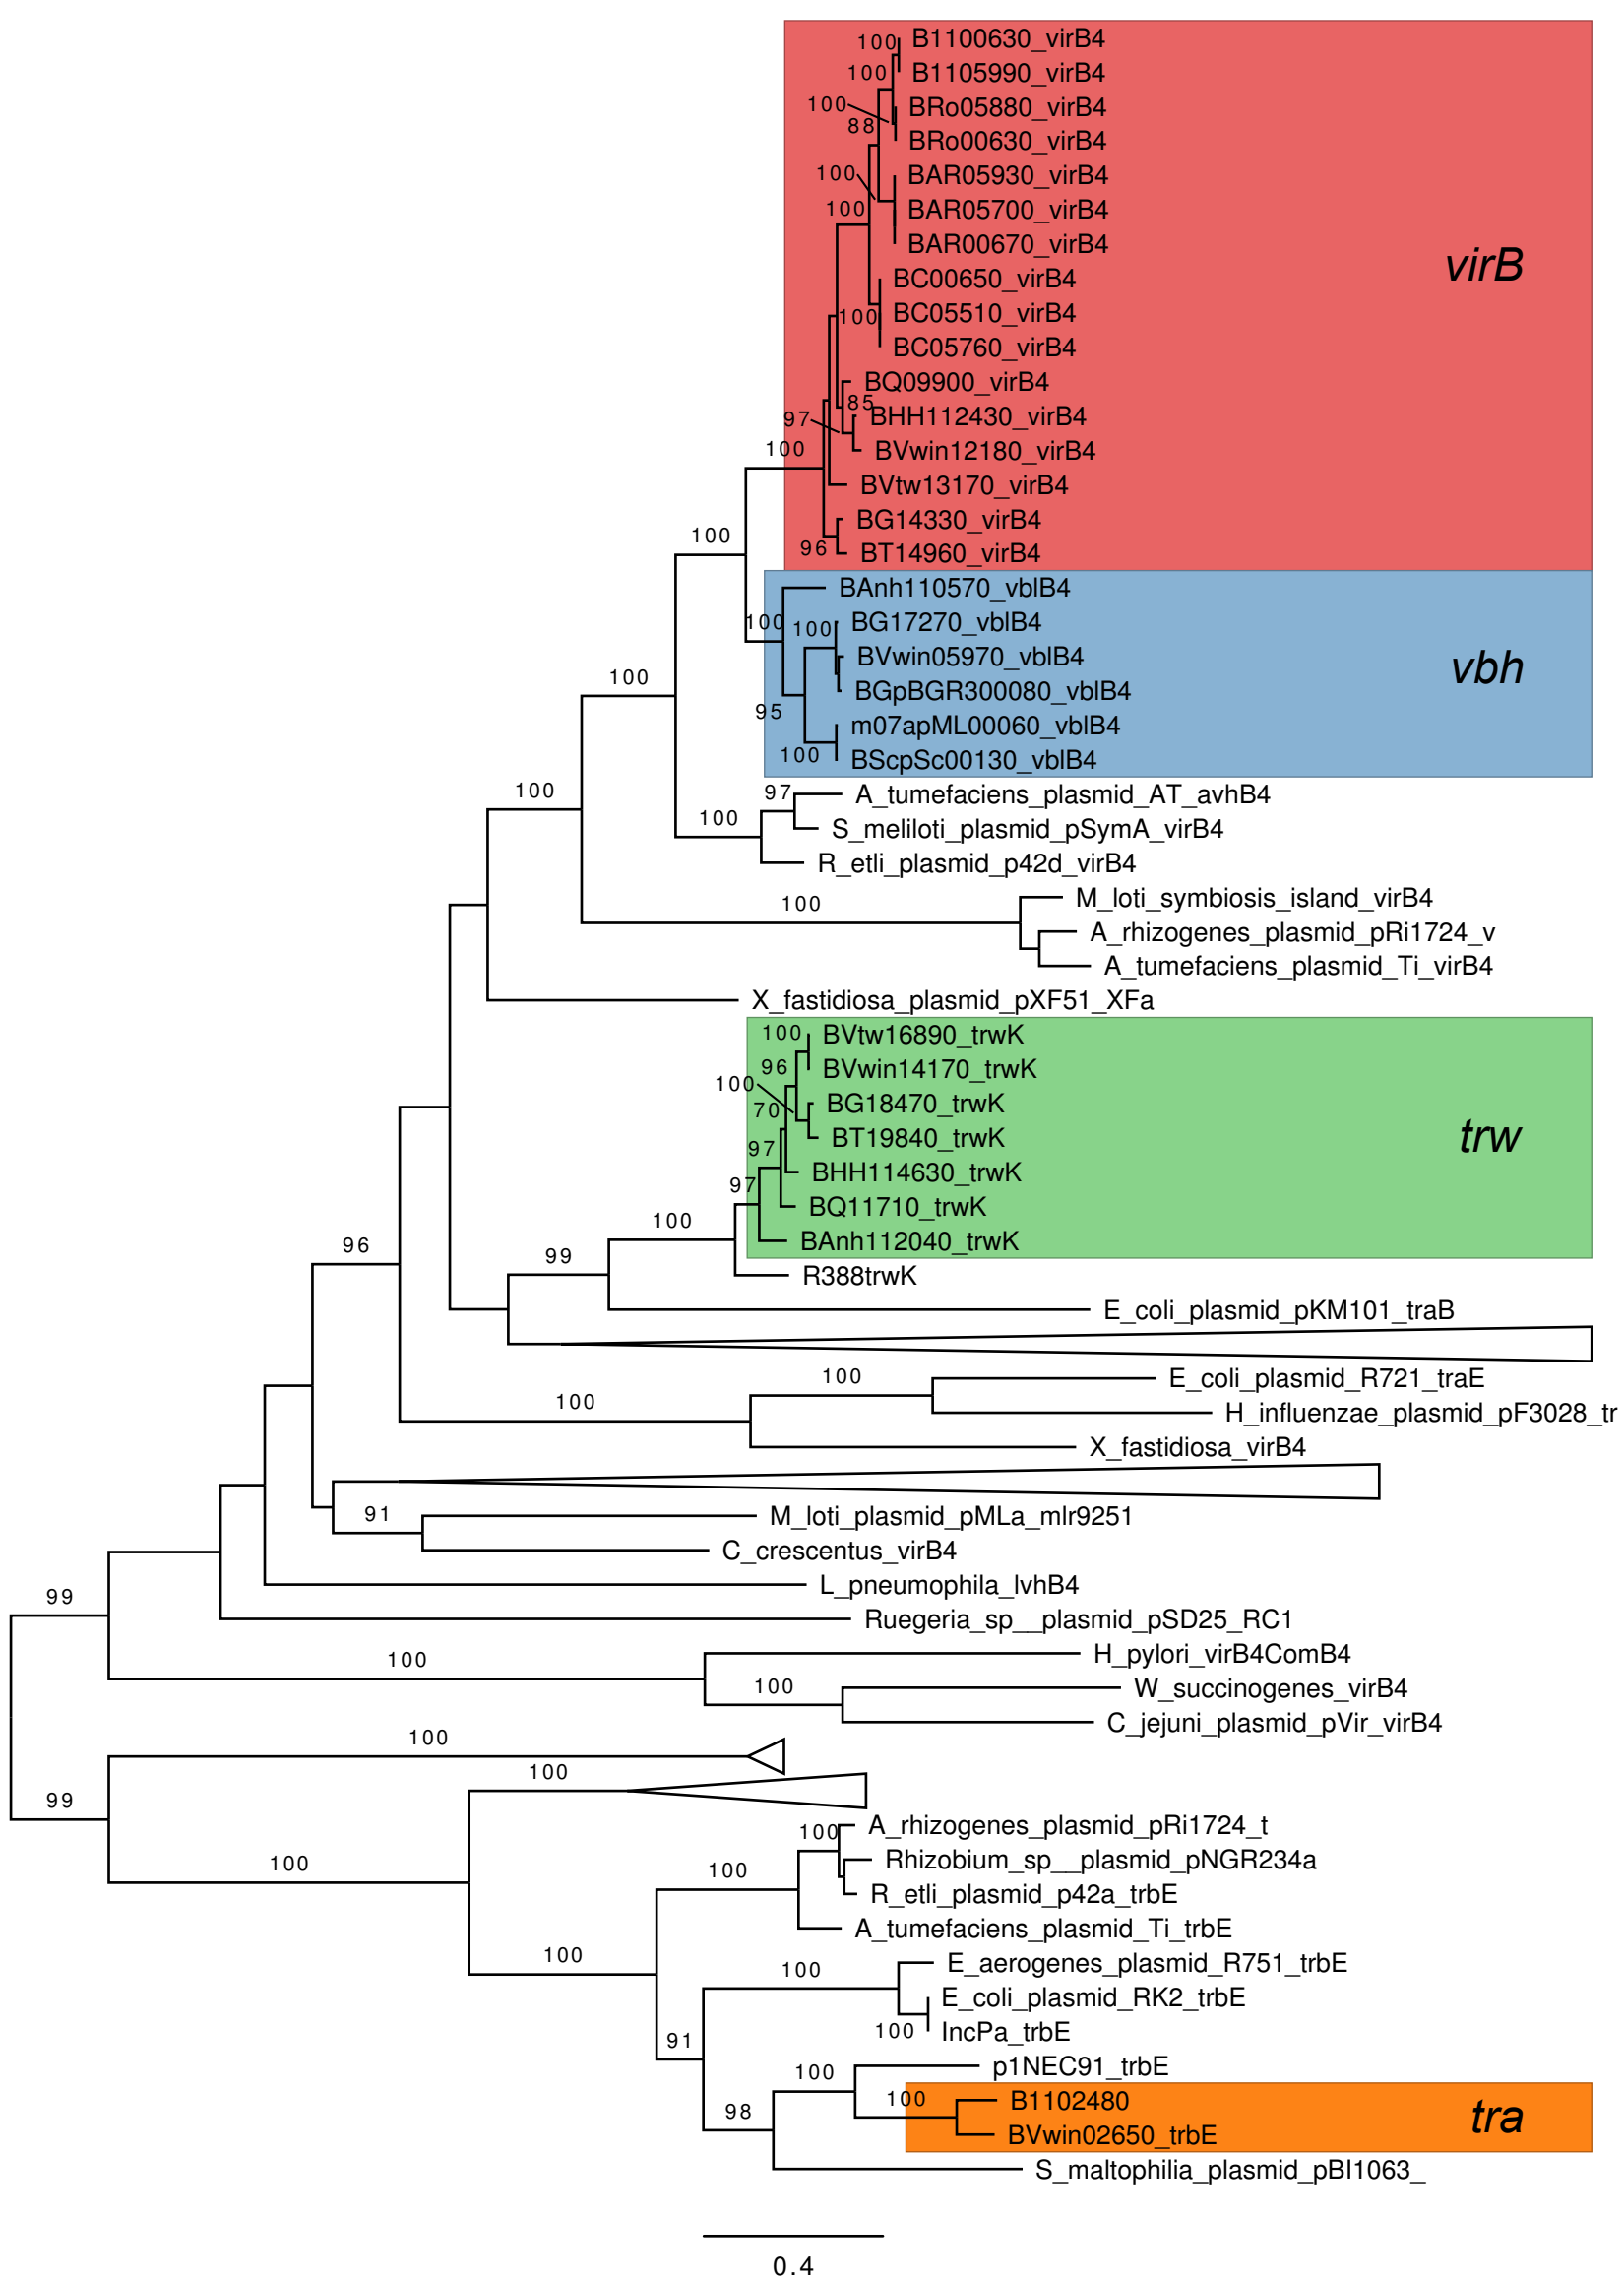

Supplement: pgen.1003393.s010.pdf [file pgen.1003393.s010.pdf]
