# Supplementary material for: A Gene Transfer Agent and a Dynamic Repertoire of Secretion Systems Hold the Keys to the Explosive Radiation of the Emerging Pathogen Bartonella
Source: PubMed Central journal article supplement (PMC3610622; doi:10.1371/journal.pgen.1003393), 2013-03-28
Supplement: pgen.1003393.s014.pdf [file pgen.1003393.s014.pdf]

|                                          | <b>BAnh1</b> | <b>BBb</b> | <b>m02</b> | <b>m07a</b> | <b>BVwin</b> | <b>BVtw</b> |
|------------------------------------------|--------------|------------|------------|-------------|--------------|-------------|
| <b>Genome shotgun sequence data</b>      |              |            |            |             |              |             |
| Number of reads (Sanger)                 | 0            | 0          | 16,000     | 0           | 20,000       | 0           |
| Number of bases (Sanger)                 | 0            | 0          | 10 Mb      | 0           | 16 Mb        | 0           |
| Read coverage (Sanger)                   | -            | -          | 5X         | -           | 9X           | -           |
| Number of reads (454)                    | 370,000      | 930,000    | 280,000    | 320,000     | 160,000      | 380,000     |
| Number of bases (454)                    | 113 Mb       | 310 Mb     | 15 Mb      | 106 Mb      | 38 Mb        | 125 Mb      |
| Instrument (454)                         | Titanium     | Titanium   | GS20       | Titanium    | FLX          | Titanium    |
| Read coverage (454)                      | 60X          | 120X       | 10X        | 60X         | 20X          | 60X         |
| Number of reads (Illumina SIPE)          | 3.7 M        | 12 M       | 3.4 M      | 2.8 M       | -            | 3.1 M       |
| Number of bases (Illumina SIPE)          | 140 Mb       | 655 Mb     | 131 Mb     | 105 Mb      | -            | 118 Mb      |
| Number of reads (Illumina LIPE)          | -            | 4.1 M      | -          | -           | -            | -           |
| Number of bases (Illumina LIPE)          | -            | 158 Mb     | -          | -           | -            | -           |
| Read coverage (Illumina)                 | 100X         | 480X       | 80X        | 60X         | -            | 60X         |
| <b>Paired-end library, 20 kb inserts</b> |              |            |            |             |              |             |
| Number of read-pairs (454)               | 6500         | 0          | 0          | 4400        | 0            | 7500        |
| <b>PCR:s</b>                             |              |            |            |             |              |             |
| Number of PCR:s tried                    | 77           | 0          | 353        | 108         | 247          | 100         |
| Number of sequenced PCR products         | 11           | 0          | 29         | 15          | 26           | 24          |
| <b>Fosmids</b>                           |              |            |            |             |              |             |
| Number of sequenced fosmid ends          | 200          | 400        | 0          | 600         | 0            | 200         |
| Number of sequenced fosmids              | 6            | 10         | 5          | 18          | 0            | 12          |
| Estimated genome size (PFGE)             | 1.7 Mb       | 1.7 Mb     | 1.7 Mb     | 1.8 Mb      | 2.0 Mb       |             |
| <b>Assembly</b>                          |              |            |            |             |              |             |
| Assembly programs <sup>^</sup>           | M,P          | M,P        | G,P        | M,P         | G,P          | M,P         |
| Number of scaffolds                      | 1            | 2          | 1          | 2           | 1            | 1           |
| Number of contigs (>1 kb)                | 1            | 17         | 3*         | 8           | 1            | 25          |
| Number of reads                          | 370,000      | 930,000    | 293,000    | 320,000     | 180,000      | 380,000     |
| Number of bases                          | 113 Mb       | 310 Mb     | 25 Mb      | 106 Mb      | 54 Mb        | 125 Mb      |
| Read coverage (without Illumina)         | 60X          | 120X       | 15X        | 60X         | 30X          | 60X         |
| Total size                               | 1.6 Mb       | 1.5 Mb     | 1.6 Mb     | 1.7 Mb      | 1.8 Mb       | 2.0 Mb      |
| Estimated genome coverage (%)**          | 100%         | 95%        | 95%        | 95%         | 100%         | 95%         |
| Status                                   | Complete     | Late draft | Late draft | Late draft  | Complete     | Draft       |

\* Two large repeat regions excluded from this number

\*\* Correctly assembled

<sup>^</sup> G = GS Assembler, M = MIRA, P = Phrap
