# Supplementary material for: A Gene Transfer Agent and a Dynamic Repertoire of Secretion Systems Hold the Keys to the Explosive Radiation of the Emerging Pathogen Bartonella
Source: PubMed Central journal article supplement (PMC3610622; doi:10.1371/journal.pgen.1003393), 2013-03-28
Supplement: pgen.1003393.s015.pdf [file pgen.1003393.s015.pdf]

| <b>ID</b>            | <b>Size (Mb)</b> | <b>Coding frac.</b> | <b>GC cont.</b> | <b>CDS:s</b> | <b>pseudo</b> | <b>tRNA:s</b> | <b>rRNA:s*</b> | <b>phage</b> |
|----------------------|------------------|---------------------|-----------------|--------------|---------------|---------------|----------------|--------------|
| BAnh1                | 1.60             | 0.8                 | 0.42            | 1265         | 20            | 42            | 2              | 118          |
| BB                   | 1.45             | 0.81                | 0.38            | 1157         | 36            | 44            | 2              | 38           |
| BBb                  | 1.62             | 0.81                | 0.37            | 1298         | 28            | 43            | 2              | 142          |
| m02                  | 1.62             | 0.8                 | 0.37            | 1296         | 44            | 42            | 2              | 159          |
| m07a                 | 1.68             | 0.82                | 0.38            | 1421         | 16            | 42            | 2              | 181          |
| m07a <sup>C</sup>    | 1.62             | 0.82                | 0.38            | 1335         | 12            | 42            | 2              | 181          |
| m07apML <sup>P</sup> | 0.06             | 0.74                | 0.35            | 83           | 4             | 0             | 0              | 0            |
| m07apMS <sup>P</sup> | 0.002            | 0.6                 | 0.4             | 3            | 0             | 0             | 0              | 0            |
| BSc                  | 1.67             | 0.8                 | 0.38            | 1410         | 26            | 42            | 2              | 236          |
| BSc <sup>C</sup>     | 1.62             | 0.81                | 0.38            | 1350         | 23            | 42            | 2              | 236          |
| BScpSc <sup>P</sup>  | 0.04             | 0.77                | 0.35            | 60           | 3             | 0             | 0              | 0            |
| BRo                  | 1.54             | 0.79                | 0.36            | 1224         | 47            | 44            | 3              | 47           |
| B11                  | 1.57             | 0.8                 | 0.36            | 1285         | 42            | 41            | 2              | 90           |
| BAR                  | 1.59             | 0.8                 | 0.36            | 1284         | 53            | 41            | 2              | 121          |
| BC                   | 1.52             | 0.81                | 0.36            | 1193         | 21            | 41            | 2              | 21           |
| BHH1                 | 1.93             | 0.72                | 0.38            | 1430         | 124           | 43            | 2              | 188          |
| BQ                   | 1.58             | 0.73                | 0.39            | 1135         | 131           | 42            | 2              | 31           |
| BVwin                | 1.80             | 0.77                | 0.39            | 1436         | 71            | 42            | 2              | 193          |
| BVtw                 | 2.02             | 0.75                | 0.4             | 1650         | 117           | 41            | 2              | 441          |
| BG                   | 2.37             | 0.73                | 0.38            | 1749         | 240           | 41            | 2              | 329          |
| BG <sup>C</sup>      | 2.34             | 0.73                | 0.38            | 1718         | 240           | 41            | 2              | 329          |
| BGpBGR3 <sup>P</sup> | 0.03             | 0.83                | 0.36            | 31           | 0             | 0             | 0              | 0            |
| BT                   | 2.64             | 0.73                | 0.39            | 2047         | 102           | 42            | 2              | 615          |
| BT <sup>C</sup>      | 2.62             | 0.73                | 0.39            | 2029         | 102           | 42            | 2              | 615          |
| BTpBtr <sup>P</sup>  | 0.02             | 0.71                | 0.35            | 18           | 0             | 0             | 0              | 0            |

\* Number of complete rRNA operons

<sup>C</sup> Chromosome

<sup>P</sup> Plasmid
