# Supplementary material for: A Gene Transfer Agent and a Dynamic Repertoire of Secretion Systems Hold the Keys to the Explosive Radiation of the Emerging Pathogen Bartonella
Source: PubMed Central journal article supplement (PMC3610622; doi:10.1371/journal.pgen.1003393), 2013-03-28
Supplement: pgen.1003393.s016.pdf [file pgen.1003393.s016.pdf]

|       | BAnh1 | BBb  | m02  | m07a | BSc  | BB   | B11  | BRo  | BAR  | BC   | BQ   | BHH1 | BVwin | BWtw | BG   | BT   | BMel | OA   | ML   | SM   | AT   | BJap | Ks    |
|-------|-------|------|------|------|------|------|------|------|------|------|------|------|-------|------|------|------|------|------|------|------|------|------|-------|
| BAnh1 |       | 0.90 | 0.90 | 0.90 | 0.90 | 0.97 | 0.99 | 0.99 | 0.97 | 0.94 | 0.95 | 0.98 | 1.01  | 1.01 | 1.05 | 1.09 | -1   | -1   | -1   | -1   | -1   | -1   | BAnh1 |
| BBb   | 0.11  |      | 0.09 | 0.25 | 0.25 | 0.68 | 0.70 | 0.70 | 0.69 | 0.66 | 0.70 | 0.72 | 0.75  | 0.75 | 0.77 | 0.81 | -1   | -1   | -1   | -1   | -1   | -1   | BBb   |
| m02   | 0.11  | 0.01 |      | 0.25 | 0.25 | 0.68 | 0.70 | 0.70 | 0.69 | 0.66 | 0.70 | 0.72 | 0.75  | 0.75 | 0.77 | 0.81 | -1   | -1   | -1   | -1   | -1   | -1   | m02   |
| m07a  | 0.10  | 0.03 | 0.03 |      | 0.05 | 0.68 | 0.70 | 0.70 | 0.70 | 0.66 | 0.70 | 0.72 | 0.75  | 0.75 | 0.77 | 0.81 | -1   | -1   | -1   | -1   | -1   | -1   | m07a  |
| BSc   | 0.10  | 0.03 | 0.03 | 0.00 |      | 0.67 | 0.70 | 0.70 | 0.69 | 0.66 | 0.70 | 0.72 | 0.74  | 0.74 | 0.77 | 0.80 | -1   | -1   | -1   | -1   | -1   | -1   | BSc   |
| BB    | 0.12  | 0.10 | 0.10 | 0.10 | 0.10 |      | 0.75 | 0.75 | 0.75 | 0.72 | 0.76 | 0.77 | 0.80  | 0.80 | 0.82 | 0.85 | -1   | -1   | -1   | -1   | -1   | -1   | BB    |
| B11   | 0.12  | 0.11 | 0.11 | 0.11 | 0.11 | 0.12 |      | 0.08 | 0.24 | 0.31 | 0.78 | 0.78 | 0.80  | 0.80 | 0.81 | 0.84 | -1   | -1   | -1   | -1   | -1   | -1   | B11   |
| BRo   | 0.12  | 0.11 | 0.11 | 0.11 | 0.11 | 0.12 | 0.01 |      | 0.24 | 0.30 | 0.78 | 0.78 | 0.80  | 0.80 | 0.81 | 0.84 | -1   | -1   | -1   | -1   | -1   | -1   | BRo   |
| BAR   | 0.12  | 0.11 | 0.11 | 0.11 | 0.11 | 0.12 | 0.04 | 0.03 |      | 0.29 | 0.77 | 0.78 | 0.79  | 0.79 | 0.81 | 0.85 | -1   | -1   | -1   | -1   | -1   | -1   | BAR   |
| BC    | 0.11  | 0.10 | 0.10 | 0.10 | 0.10 | 0.11 | 0.04 | 0.04 | 0.04 |      | 0.73 | 0.74 | 0.76  | 0.76 | 0.78 | 0.82 | -1   | -1   | -1   | -1   | -1   | -1   | BC    |
| BQ    | 0.11  | 0.10 | 0.10 | 0.10 | 0.10 | 0.11 | 0.11 | 0.11 | 0.11 | 0.11 |      | 0.38 | 0.51  | 0.51 | 0.55 | 0.60 | -1   | -1   | -1   | -1   | -1   | -1   | BQ    |
| BHH1  | 0.11  | 0.10 | 0.11 | 0.10 | 0.10 | 0.11 | 0.11 | 0.11 | 0.11 | 0.11 | 0.05 |      | 0.51  | 0.51 | 0.56 | 0.60 | -1   | -1   | -1   | -1   | -1   | -1   | BHH1  |
| BVwin | 0.11  | 0.11 | 0.11 | 0.10 | 0.10 | 0.11 | 0.12 | 0.11 | 0.12 | 0.11 | 0.06 | 0.06 |       | 0.01 | 0.56 | 0.60 | -1   | -1   | -1   | -1   | -1   | -1   | BVwin |
| BWtw  | 0.11  | 0.11 | 0.11 | 0.10 | 0.10 | 0.11 | 0.12 | 0.11 | 0.12 | 0.11 | 0.06 | 0.06 | 0.00  |      | 0.56 | 0.60 | -1   | -1   | -1   | -1   | -1   | -1   | BWtw  |
| BG    | 0.11  | 0.11 | 0.11 | 0.11 | 0.11 | 0.12 | 0.12 | 0.12 | 0.12 | 0.11 | 0.07 | 0.06 | 0.06  | 0.06 |      | 0.30 | -1   | -1   | -1   | -1   | -1   | -1   | BG    |
| BT    | 0.11  | 0.11 | 0.11 | 0.11 | 0.11 | 0.12 | 0.12 | 0.12 | 0.12 | 0.12 | 0.07 | 0.07 | 0.07  | 0.07 | 0.03 |      | -1   | -1   | -1   | -1   | -1   | -1   | BT    |
| BMel  | 0.29  | 0.29 | 0.29 | 0.29 | 0.29 | 0.29 | 0.30 | 0.30 | 0.30 | 0.29 | 0.29 | 0.29 | 0.29  | 0.29 | 0.29 | 0.29 |      | 0.73 | 1.02 | 1.13 | 1.08 | 1.12 | BMel  |
| OA    | 0.29  | 0.29 | 0.29 | 0.29 | 0.29 | 0.29 | 0.30 | 0.30 | 0.30 | 0.29 | 0.29 | 0.29 | 0.29  | 0.29 | 0.29 | 0.29 | 0.05 |      | 1.10 | 1.21 | 1.15 | 1.21 | OA    |
| ML    | 0.33  | 0.33 | 0.33 | 0.33 | 0.33 | 0.33 | 0.34 | 0.34 | 0.34 | 0.33 | 0.33 | 0.33 | 0.32  | 0.32 | 0.33 | 0.33 | 0.22 | 0.22 |      | 0.84 | 0.95 | 0.75 | ML    |
| SM    | 0.34  | 0.35 | 0.35 | 0.34 | 0.34 | 0.35 | 0.35 | 0.35 | 0.35 | 0.35 | 0.34 | 0.34 | 0.34  | 0.34 | 0.34 | 0.34 | 0.24 | 0.24 | 0.25 |      | 0.95 | 0.85 | SM    |
| AT    | 0.35  | 0.35 | 0.35 | 0.35 | 0.35 | 0.35 | 0.36 | 0.36 | 0.36 | 0.35 | 0.35 | 0.35 | 0.35  | 0.35 | 0.35 | 0.35 | 0.26 | 0.25 | 0.26 | 0.16 |      | 0.99 | AT    |
| BJap  | 0.43  | 0.44 | 0.44 | 0.43 | 0.43 | 0.44 | 0.44 | 0.44 | 0.44 | 0.44 | 0.43 | 0.43 | 0.43  | 0.43 | 0.43 | 0.43 | 0.37 | 0.36 | 0.36 | 0.37 | 0.38 |      | BJap  |
| Ka    | BAnh1 | BBb  | m02  | m07a | BSc  | BB   | B11  | BRo  | BAR  | BC   | BQ   | BHH1 | BVwin | BWtw | BG   | BT   | BMel | OA   | ML   | SM   | AT   | BJap |       |
