# Supplementary material for: A Gene Transfer Agent and a Dynamic Repertoire of Secretion Systems Hold the Keys to the Explosive Radiation of the Emerging Pathogen Bartonella
Source: PubMed Central journal article supplement (PMC3610622; doi:10.1371/journal.pgen.1003393), 2013-03-28
Supplement: pgen.1003393.s017.pdf [file pgen.1003393.s017.pdf]

| <b>Product</b>                                             | <b>Gene families</b> | <b>Genes</b> |
|------------------------------------------------------------|----------------------|--------------|
| phage-related protein                                      | 23                   | 685          |
| hypothetical protein                                       | 48                   | 729          |
| T4SS-related protein (trwL, trwJ, korA, korB, virB7/vblB7) | 5                    | 102          |
| surface protein/Bartonella adhesin (badA)                  | 1                    | 20           |
| pertactin family virulence factor/autotransporter (autoB)  | 1                    | 14           |
| hypothetical protein,nuclease (SNase-like)                 | 1                    | 19           |
| sodium/dicarboxylate symporter                             | 1                    | 16           |
| DNA-damage-inducible protein J                             | 1                    | 16           |
| putative virulence determinant                             | 1                    | 16           |
| thiamine-phosphate pyrophosphorylase ThiE                  | 1                    | 16           |
| cell wall hydrolase SleB                                   | 1                    | 16           |
| cytochrome c-type biogenesis protein CycH                  | 1                    | 16           |
| ATP-dependent helicase (fragment)                          | 1                    | 15           |
| SH3-domain protein                                         | 1                    | 11           |
| YacA protein                                               | 1                    | 10           |
| PemK protein                                               | 1                    | 9            |
| PemI protein                                               | 1                    | 8            |
| LysM domain/BON superfamily protein                        | 1                    | 7            |
| orotidine-5'-phosphate decarboxylase                       | 1                    | 8            |
| putative permease of the major facilitator superfamily     | 1                    | 4            |
