# Supplementary material for: A Gene Transfer Agent and a Dynamic Repertoire of Secretion Systems Hold the Keys to the Explosive Radiation of the Emerging Pathogen Bartonella
Source: PubMed Central journal article supplement (PMC3610622; doi:10.1371/journal.pgen.1003393), 2013-03-28
Supplement: pgen.1003393.s018.pdf [file pgen.1003393.s018.pdf]

| <b>Region</b>          | <b>Number of genes</b> | <b>Ka</b>      | <b>Ks</b>     |
|------------------------|------------------------|----------------|---------------|
| Core, upstream BaGTA   | 9-12                   | 0.100 +/- 0.14 | 0.57 +/- 0.40 |
| BaGTA                  | 11-13                  | 0.098 +/- 0.11 | 0.54 +/- 0.37 |
| Core, inter BaGTA-ROR  | 9-12                   | 0.073 +/- 0.07 | 0.60 +/- 0.42 |
| ROR                    | 6-7                    | 0.095 +/- 0.08 | 0.53 +/- 0.34 |
| Core, downstream ROR   | 10                     | 0.095 +/- 0.11 | 0.49 +/- 0.45 |
| Genome-wide core genes | 428                    | 0.044 +/- 0.02 | 0.37 +/- 0.19 |
