# Supplementary material for: A Gene Transfer Agent and a Dynamic Repertoire of Secretion Systems Hold the Keys to the Explosive Radiation of the Emerging Pathogen Bartonella
Source: PubMed Central journal article supplement (PMC3610622; doi:10.1371/journal.pgen.1003393), 2013-03-28
Supplement: pgen.1003393.s019.pdf [file pgen.1003393.s019.pdf]

|                                         | ROR to BaGTA | ROR to rrs-1      | ROR to trw | rrs-1 to trw       |
|-----------------------------------------|--------------|-------------------|------------|--------------------|
| BAnh1                                   | 23           | 151               | 100        | 258                |
| BBb                                     | 29           | 239               | -          | 345                |
| BB                                      | 35           | (59) <sup>a</sup> | -          | (155) <sup>a</sup> |
| BC                                      | 26           | 75                | -          | 162                |
| BQ                                      | 32           | 174               | 122        | 306                |
| BHH1                                    | 49           | 248               | 152        | 409                |
| BVwin                                   | 30           | 197               | 138        | 344                |
| BG                                      | 91           | 262               | 205        | 481                |
| BT                                      | 82           | 319               | 280        | 615                |
| <b>Median</b>                           | <b>32</b>    | <b>197</b>        | <b>145</b> | <b>344</b>         |
| <i>Median w/o BC and BB<sup>b</sup></i> | <i>31</i>    | <i>218</i>        | <i>145</i> | <i>344.5</i>       |

<sup>a</sup> Due to the large inversion in *B. bacilliformis*, these distances have been estimated from the second break-point of the inversion, located just upstream from rrs-2, and is thus artificially smaller.

<sup>b</sup> Due to the major rearrangements in *B. bacilliformis* and in group B strains, a separate statistic is shown for groups A, C and BAnh1.
